# Supplementary material
Source: PubMed Central journal article supplement (PMC5571369)
Supplement: AAC.02752-16_zac009176500s1.pdf [file AAC.02752-16_zac009176500s1.pdf]

## Figure S1

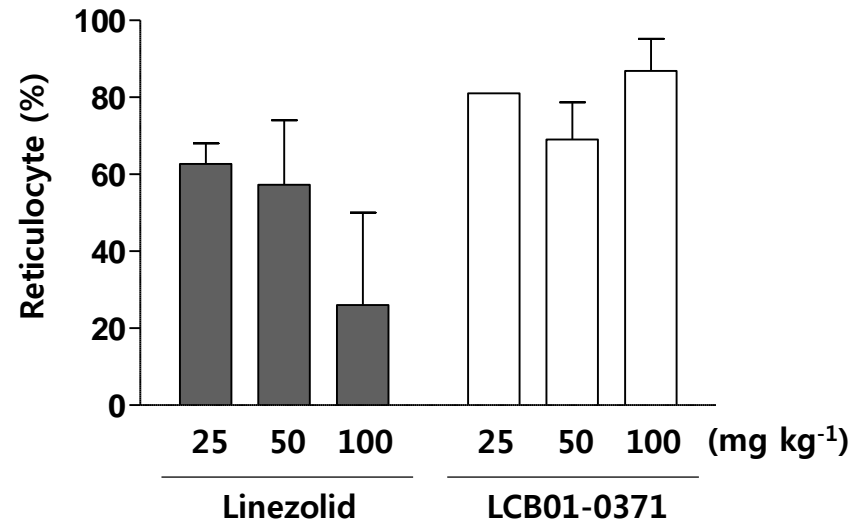

**Figure S1** Reticulocyte count of treated groups following 7 days of LCB01-0371 therapy.

Linezolid and LCB01-0371 at 25, 50, and 100 mg/kg were orally administered for 7 days in SD rat twice-daily (total daily doses are: 50, 100, 200 mg/kg) and blood samples were analyzed at day 8. Reticulocyte count on 7 day was significantly higher when LCB01-0371 was administered at all different conditions.

**Figure S2**

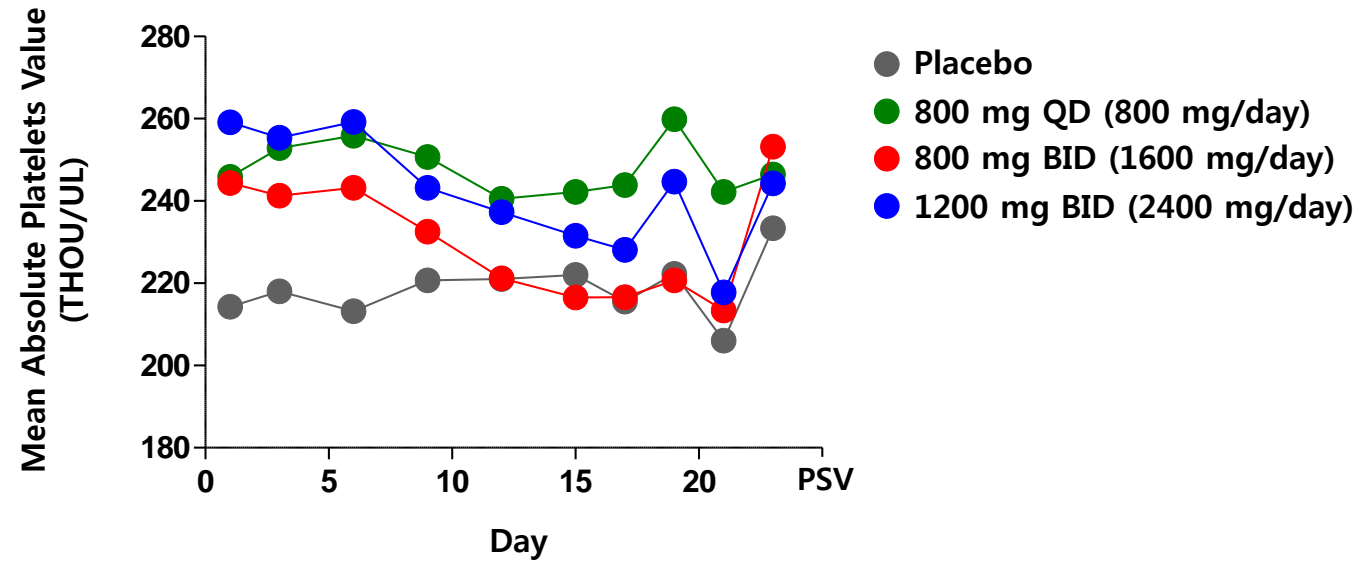

**Figure S2** Mean platelet counts after treatment with LCB01-0371 over time (Multiple Ascending Dose) in phase 1b trial.

The patients receiving LCB01-0371 (800, 1600, and 2400 mg/day) are shown.

## Figure S3

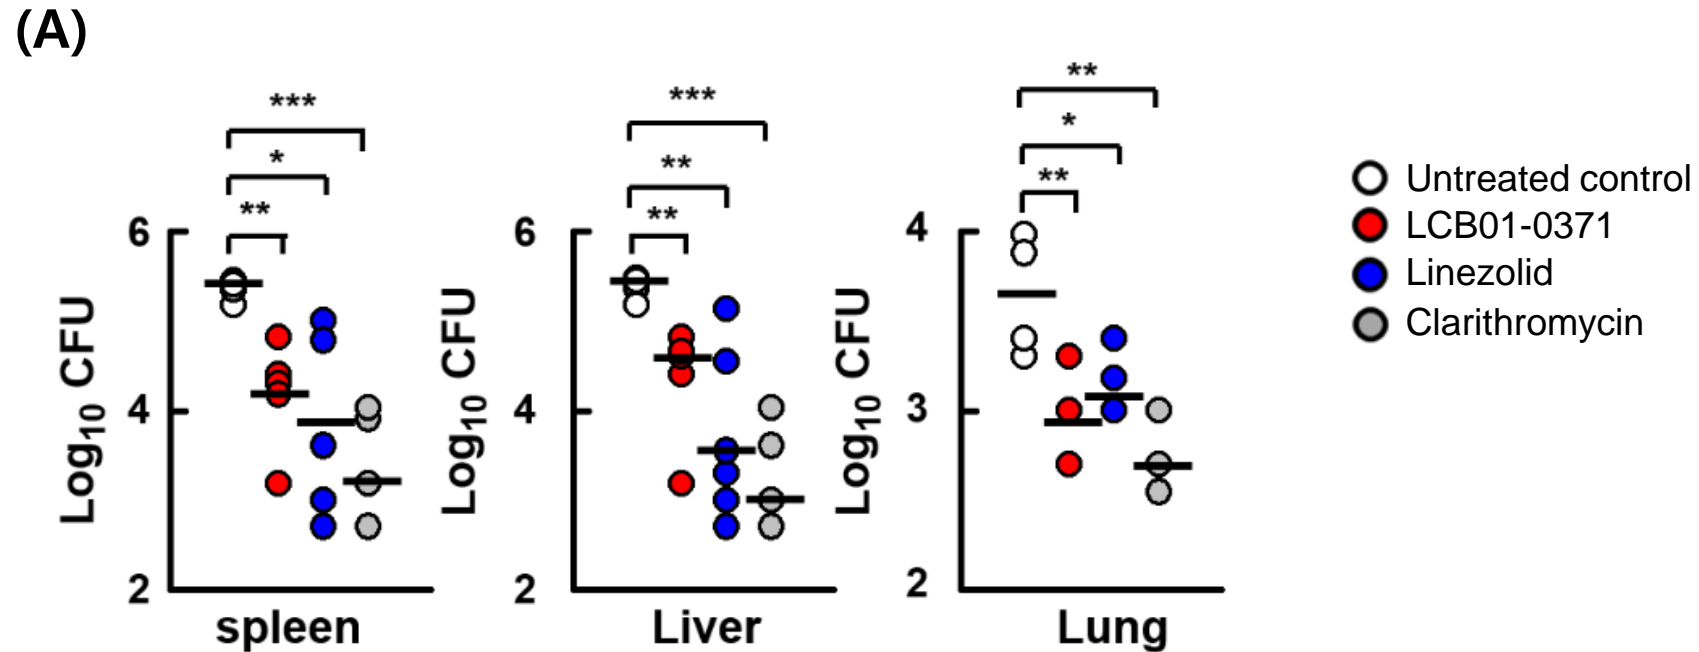

**Figure S3** *In vivo* efficacy of LCB01-0371, linezolid, and clarithromycin against *Mycobacterium abscessus* infection in two different media.

C57BL/6 WT female mice (n=6) were infected intravenously with  $1 \times 10^7$  CFU *M. abscessus*. After 2 days of infection, mice were treated for 4 consecutive days with 1000 mg/kg LCB01-0371 and linezolid. Clarithromycin (200 mg/kg) and distilled water were used as positive and negative controls, respectively. The spleen, liver, and lung were harvested, and bacterial load was determined using 7H11 agar enriched with 10% OADC (A) and 5% BSA (B). Error bars represent  $\pm$ SEM from two independent experiments (\* $P < 0.05$ , \*\* $P < 0.01$ , \*\*\* $P < 0.001$ ).

Figure S3

(B)

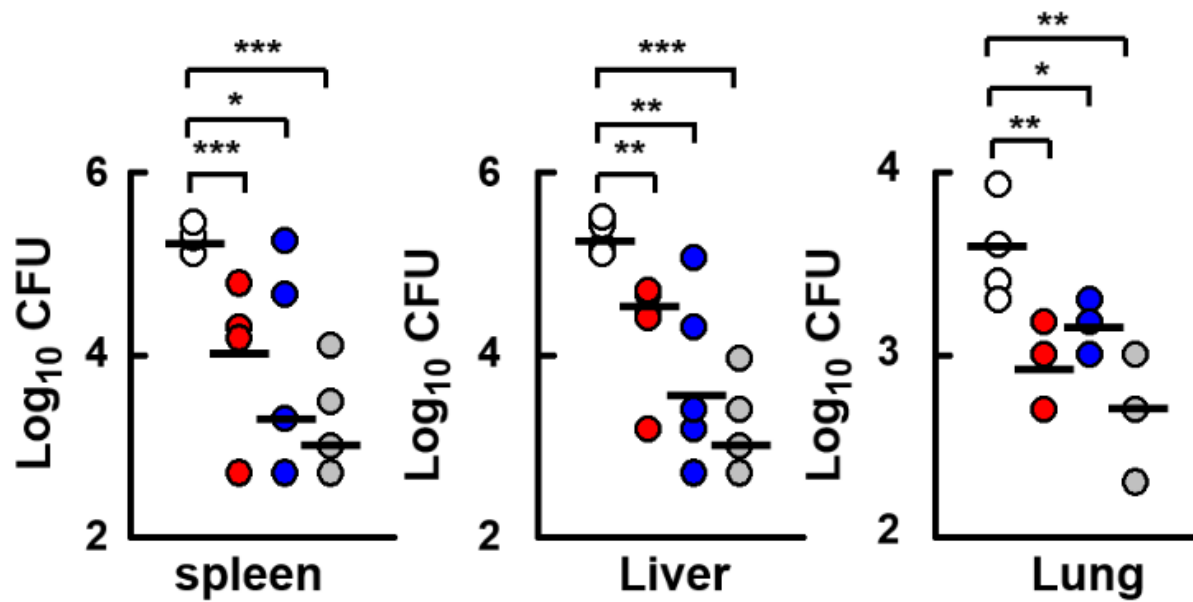

Figure S4

(A)

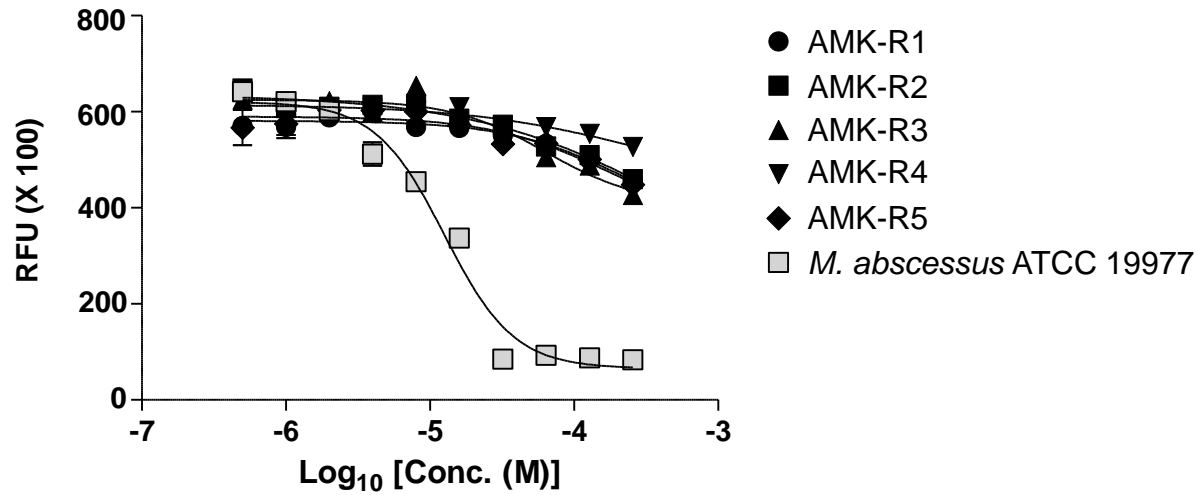

(B)

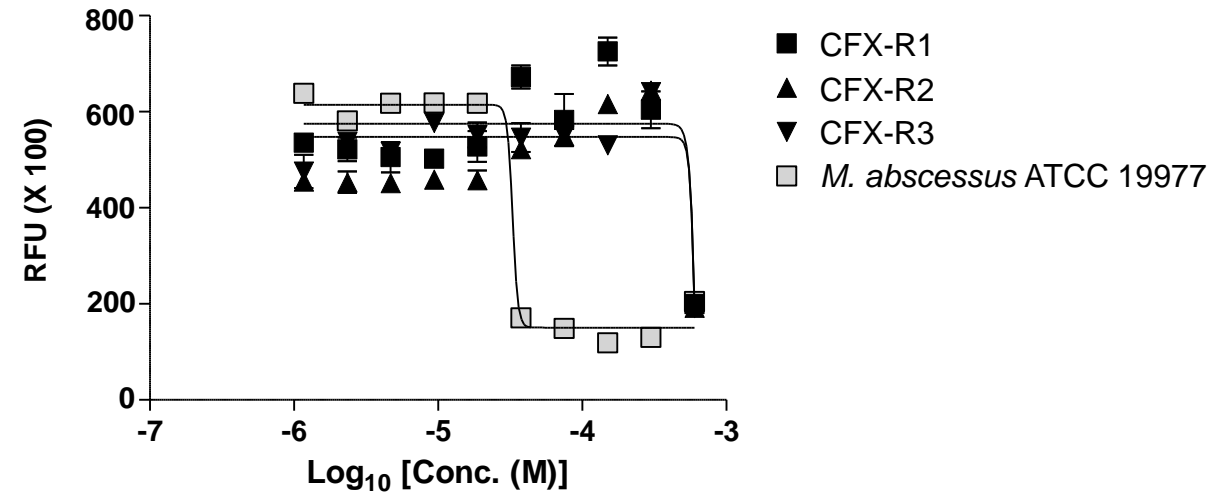

Figure S4 Activities of amikacin, cefoxitin, and clarithromycin against laboratory-generated amikacin, cefoxitin, and clarithromycin-resistant clones.

Dose-response curves of amikacin, cefoxitin, and clarithromycin against *Mycobacterium abscessus* AMK-R clones #1-5 (A), *M. abscessus* CFX-R clones #1-3 (B), and *M. abscessus* CLA-R clones #1-5 (C), using the resazurin-based assay. Each concentration was tested in triplicate.

Figure S4

(C)

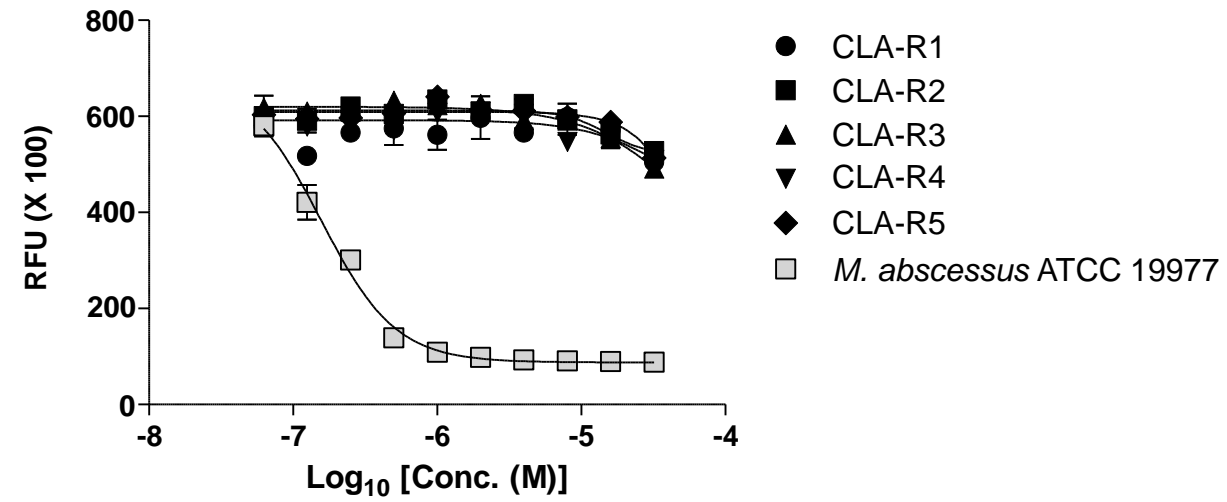

**Figure S5**

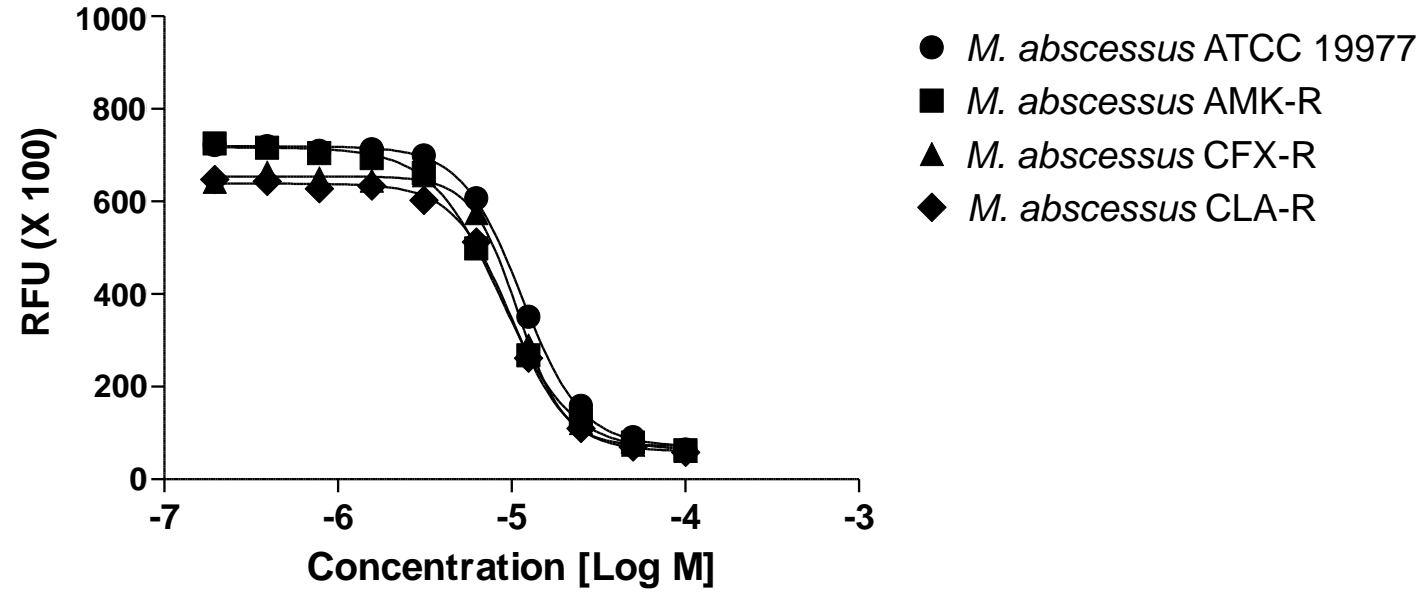

**Figure S5** Activity of LCB01-0371 against laboratory-generated amikacin, cefoxitin, and clarithromycin-resistant clones.

Dose-response curve was generated by treatment with LCB01-0371 against *Mycobacterium abscessus* AMK-R, *M. abscessus* CFX-R, and *M. abscessus* CLA-R in comparison with *M. abscessus* ATCC 19977. Each concentration was tested in triplicate.

**TABLE S1** In vivo pharmacokinetic parameters of linezolid and LCB01-0371.

|                              | Mouse     |            | Rat       |            |
|------------------------------|-----------|------------|-----------|------------|
|                              | Linezolid | LCB01-0371 | Linezolid | LCB01-0371 |
| PO (mg/kg)                   | 30        | 30         | 10        | 10         |
| AUC (mg.h/L)                 | 73.39     | 48.28      | 23.91     | 16.24      |
| AUC <sub>norm</sub> (kg.h/L) | 2.45      | 1.61       | 2.39      | 1.62       |
| C <sub>max</sub> (mg/L)      | 29.73     | 24.45      | 6.16      | 4.03       |
| C <sub>max norm</sub> (kg/L) | 0.99      | 0.82       | 0.62      | 0.40       |
| t <sub>max</sub> (h)         | 0.25      | 0.5        | 0.5       | 1.17       |
| t <sub>1/2</sub> (h)         | 1.42      | 1.11       | 1.00      | 1.13       |
| F (%)                        | ND        | ND         | 155.6     | 68.6       |



**TABLE S2** Pharmacokinetics of LCB01-0371 from phase 1b multiple ascending dose (MAD) study.

|                                     | 400 mg      |             | 800 mg      |             | 1200 mg       |              |
|-------------------------------------|-------------|-------------|-------------|-------------|---------------|--------------|
|                                     | 1 day       | 7 day       | 1 day       | 7 day       | 1 day         | 7 day        |
| $C_{max}$ (µg/mL)                   | 5.62 ±2.39  | 5.11 ±1.98  | 11.15 ±5.88 | 14.17 ±4.69 | 13.83 ± 2.07  | 20.25 ±7.15  |
| $T_{max}$ (hr)                      | 0.60 ±0.14  | 0.92 ±0.56  | 1.04 ±0.75  | 0.71 ±0.25  | 1.13 ±0.63    | 1.04 ±0.60   |
| $T_{1/2}$ (hr)                      | 1.56 ±0.07  | 2.36 ±0.94  | 1.58 ±0.17  | 1.97 ±0.39  | 1.69 ±0.17    | 2.23 ±0.26   |
| $AUC_{tau}$ (µg.hr/mL)              | 7.79 ±2.96  | 8.38 ±2.75  | 19.46 ±4.38 | 28.10 ±7.75 | 38.15 ± 14.22 | 41.60 ±12.99 |
| $AUC_{0-inf}$ (µg.hr/mL)            | 7.83 ±2.99  | 8.36 ±2.75  | 19.56 ±4.44 | 28.36 ±7.91 | 38.56 ±14.52  | 41.62 ±13.00 |
| Accumulation ratio<br>(D7AUC/D1AUC) | 1.13 ± 0.12 |             | 1.47 ± 0.44 |             | 1.11 ± 0.20   |              |
| $V_z/F$ (L/kg)                      | 2.02 ±0.93  | 2.89 ± 2.13 | 1.49 ± 0.31 | 1.37 ±0.71  | 1.28 ± 0.37   | 1.62 ±0.81   |
| $CL/F$ (L/hr/kg)                    | 0.91 ±0.42  | 0.80 ± 0.25 | 0.66 ±0.17  | 0.47 ±0.18  | 0.54 ±0.19    | 0.50 ±0.23   |
| MRT <sub>last</sub> (hr)            | 2.23 ±0.20  | 2.55 ± 0.61 | 2.37 ±0.29  | 2.43 ±0.49  | 2.90 ±0.43    | 2.81 ±0.40   |
| $C_{max\_norm}$ (kg/L)              | 0.91 ±0.39  | 0.83 ±0.32  | 0.91 ±0.48  | 1.15 ±0.38  | 0.75 ±0.11    | 1.10 ±0.39   |
| $AUC_{0-inf\_norm}$ (kg.hr/L)       | 1.27 ±0.49  | 1.36 ± 0.45 | 1.59 ±0.36  | 2.30 ±0.64  | 2.09 ±0.79    | 2.25 ±0.70   |

Double blind, randomized, placebo control

MAD dose : 400 mg, 800 mg, 1200 mg or 1600 mg LCB01-0371 twice daily (BID) for 7 days

N = 8 (6 active+2 placebo)

**TABLE S3** GLP-Tox study.

| Study                                              | Comments                             |                            |
|----------------------------------------------------|--------------------------------------|----------------------------|
|                                                    | PO (mg/kg)                           | IV (1 hr infusion) (mg/kg) |
| <b>General Toxicity</b>                            |                                      |                            |
| Single dose acute toxicity study in rats           | MTD = 2000                           | MTD = 1000                 |
| 14-day dose range-finding study in rats with TK    | NOAEL = 100                          |                            |
| 4-week toxicity study in rats with 4-week recovery | NOAEL = 60                           | NOAEL = 120                |
| Single dose acute toxicity study in dogs           | MTD = 1000                           | MTD = 500                  |
| 14-day dose range-finding study in dogs with TK    | NOAEL < 40                           | NOAEL < 40                 |
| 4-week toxicity study in dogs with 4-week recovery | NOAEL<br>(male = 20 and female=10)   | NOAEL = 15                 |
| <b>Genetic Toxicity</b>                            |                                      |                            |
| Ames test                                          | Negative                             |                            |
| <i>In vitro</i> chromosomal aberration test        | Negative                             |                            |
| Rat micronucleus test                              | Negative                             |                            |
| <b>Safety Pharmacology</b>                         |                                      |                            |
| Assessment of blockage of hERG potassium channels  | Negative (IC <sub>50</sub> > 100 μM) |                            |
| Cardiovascular telemetry study in beagle dogs      | Negative                             |                            |
| Respiratory (Pulmonary) study in rats              | Negative                             |                            |
| Neurobehavioral safety evaluation in rats          | Negative                             |                            |
